# Supplementary material for: Benzodithiophene based π-conjugated macrocycles: synthesis, morphology and electrochemical characterization
Source: Royal Society of Chemistry journal article supplement (doi:10.1039/c4ob01043d), 2014-07-28
Supplement: c4ob01043d1.pdf [file c4ob01043d1.pdf]

# Benzodithiophene based $\pi$ -conjugated macrocycle: synthesis, morphology and electrochemical characterizaion

Anjan Bedi,\* Sanjio S. Zade\*

*Department of Chemical Sciences, Indian Institute of Science Education and Research (IISER)  
Kolkata, Mohanpur 741246, India.*

[\*] email: [sanjiozade@iiserkol.ac.in](mailto:sanjiozade@iiserkol.ac.in), [anjan.bedi@gmail.com](mailto:anjan.bedi@gmail.com)

| Contents                                                                                                                                                                                                                                                                                                  | Page number |
|-----------------------------------------------------------------------------------------------------------------------------------------------------------------------------------------------------------------------------------------------------------------------------------------------------------|-------------|
| <b>Figure S1.</b> $^1\text{H}$ NMR of reported compound <b>3</b>                                                                                                                                                                                                                                          | <b>S2</b>   |
| <b>Figure S2.</b> $^{13}\text{C}$ NMR of reported compound <b>3</b>                                                                                                                                                                                                                                       | <b>S3</b>   |
| <b>Figure S3.</b> $^1\text{H}$ NMR of newly synthesized compound <b>4</b>                                                                                                                                                                                                                                 | <b>S4</b>   |
| <b>Figure S4.</b> $^{13}\text{C}$ NMR of newly synthesized compound <b>4</b>                                                                                                                                                                                                                              | <b>S5</b>   |
| <b>Figure S5.</b> $^1\text{H}$ NMR of newly synthesized compound <b>5</b>                                                                                                                                                                                                                                 | <b>S6</b>   |
| <b>Figure S6.</b> $^{13}\text{C}$ NMR of newly synthesized compound <b>5</b>                                                                                                                                                                                                                              | <b>S7</b>   |
| <b>Figure S7.</b> MALDI-TOF mass spectrometry of <b>5</b>                                                                                                                                                                                                                                                 | <b>S8</b>   |
| <b>Figure S8.</b> UV-vis spectra of the macrocycle ( <b>5</b> ) in various solvents                                                                                                                                                                                                                       | <b>S8</b>   |
| <b>Figure S9.</b> (a) Micrograph on a glass plate using a light microscope with 1000 $\times$ magnification. (b) AFM topography of a single fibre obtained on $\text{SiO}_2$ surface. (c) SEM images of single microfiber of the macrocycle on a silicon wafer with 44000 $\times$ magnification (right). | <b>S9</b>   |
| <b>Table 1.</b> NICS (0 to 2 and 0 to -2) value calculated at B3LYP/6-311+G(d,p) on the optimized structure of macrocycle <b>5</b> at B3LYP/6-31G(d).                                                                                                                                                     | <b>S9</b>   |
| <b>Figure S10.</b> Optimized structure of the frontier orbitals; (a) HOMO and (b) LUMO of the macrocycle                                                                                                                                                                                                  | <b>S10</b>  |
| <b>Fig. S11</b> Decay of fluorescence for compound <b>5</b> in solution (49.06 $\mu\text{M}$ ) and thin film on ITO-coated glass.                                                                                                                                                                         | <b>S10</b>  |
| <b>Fig. S12</b> Concentration dependent fluorescence spectra of <b>5</b> in THF.                                                                                                                                                                                                                          | <b>S11</b>  |
| <b>Fig. S13</b> Time-dependent absorption (left) and fluorescence (right) spectra of macrocycle <b>5</b> in THF.                                                                                                                                                                                          | <b>S11</b>  |
| <b>Fig. S14</b> Powder XRD pattern of compound <b>5</b> .                                                                                                                                                                                                                                                 | <b>S11</b>  |
| Coordinates for optimized geometry of <b>5</b> at B3LYP/6-31G(d) with optimized energy value                                                                                                                                                                                                              | <b>S12</b>  |
| Reference 28 in full                                                                                                                                                                                                                                                                                      | <b>S13</b>  |

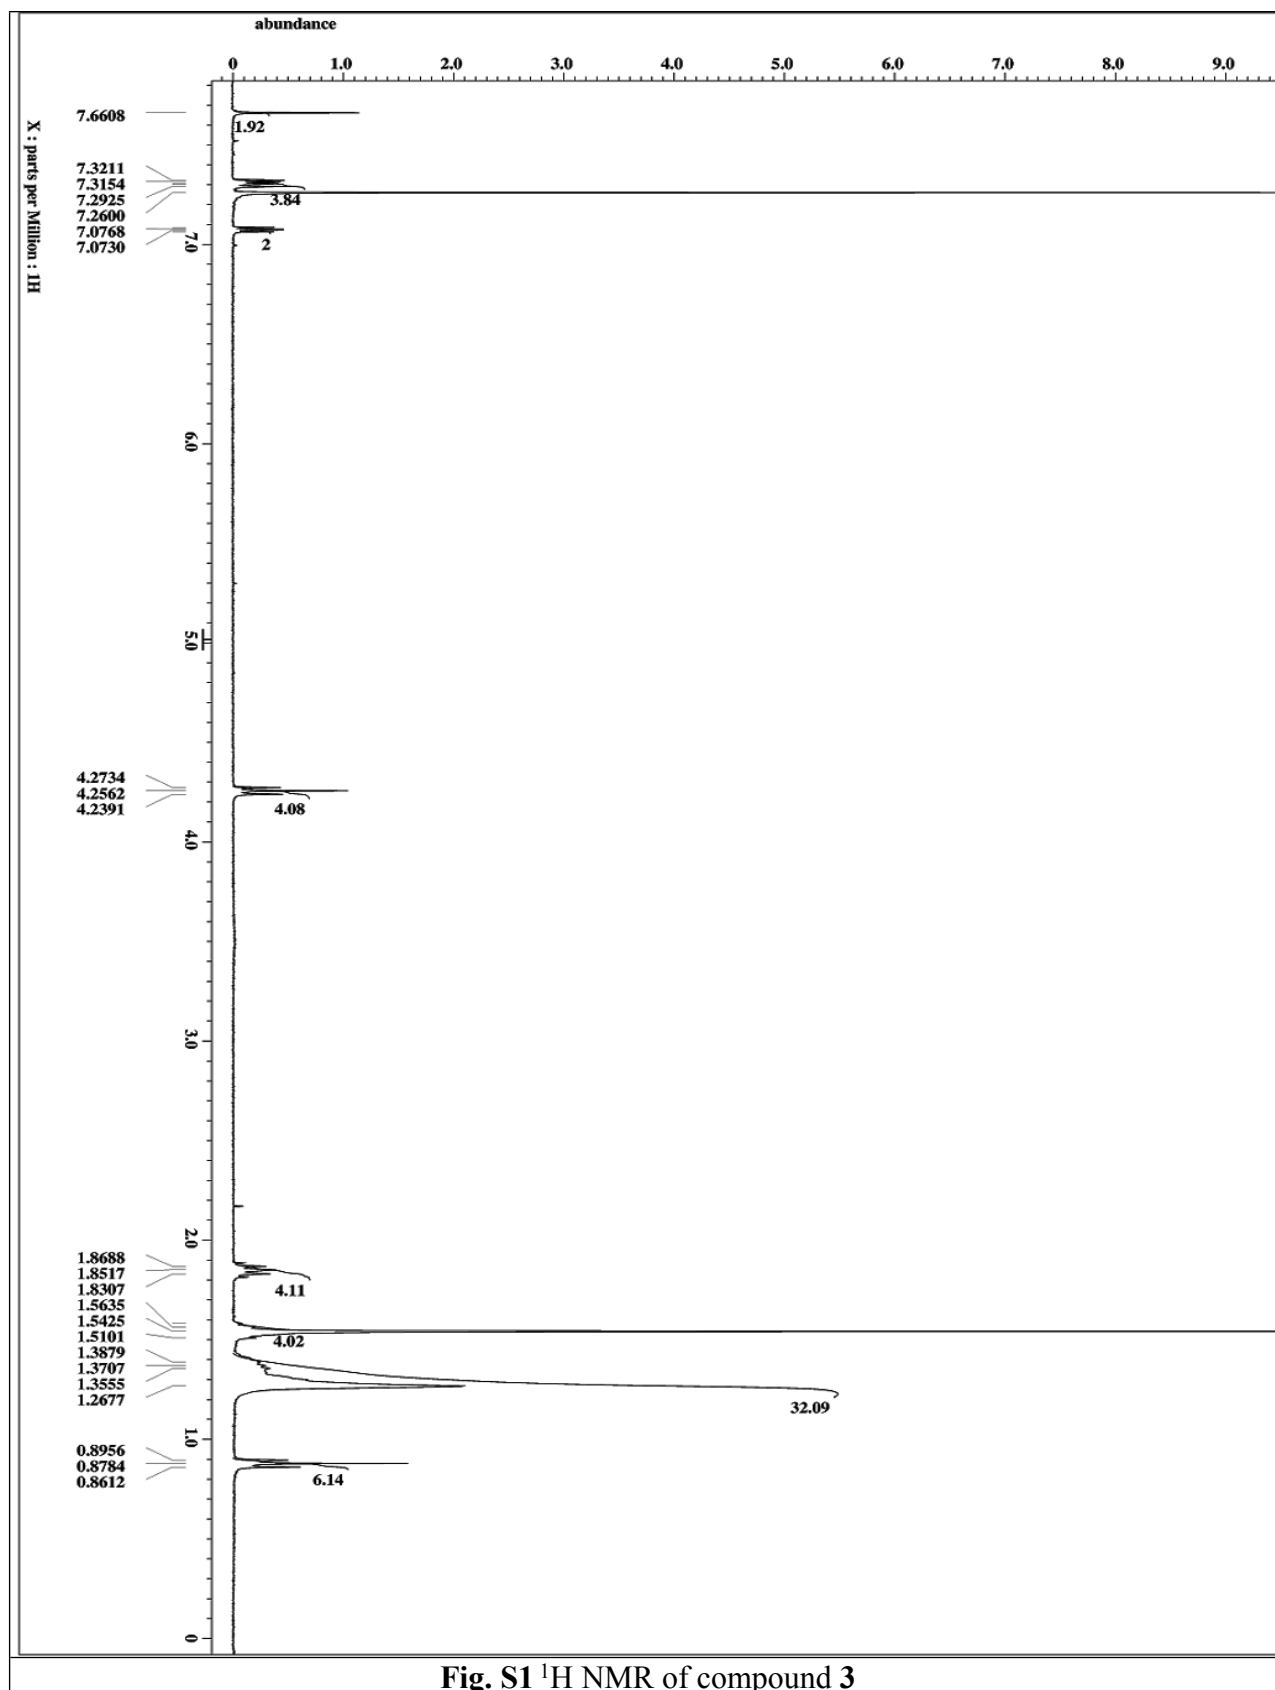

Fig. S1  $^1\text{H}$  NMR of compound **3**

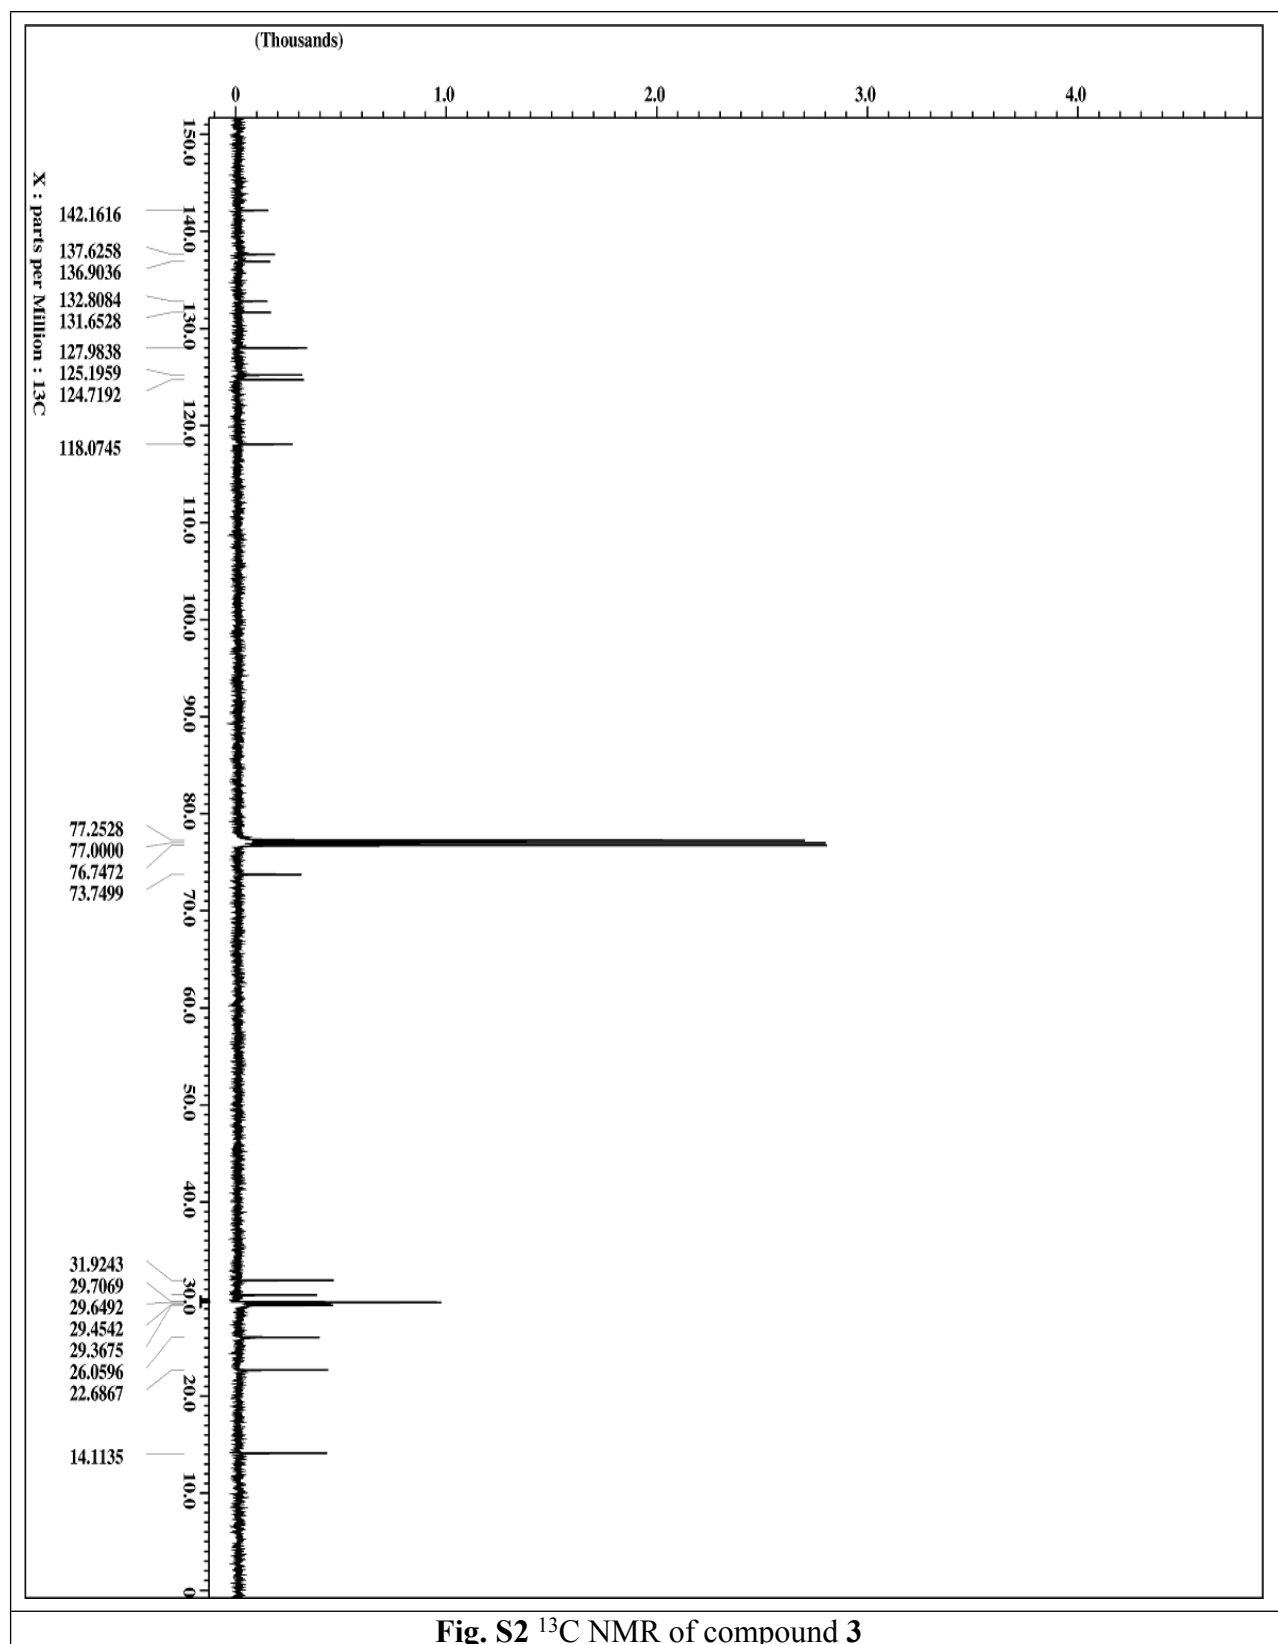

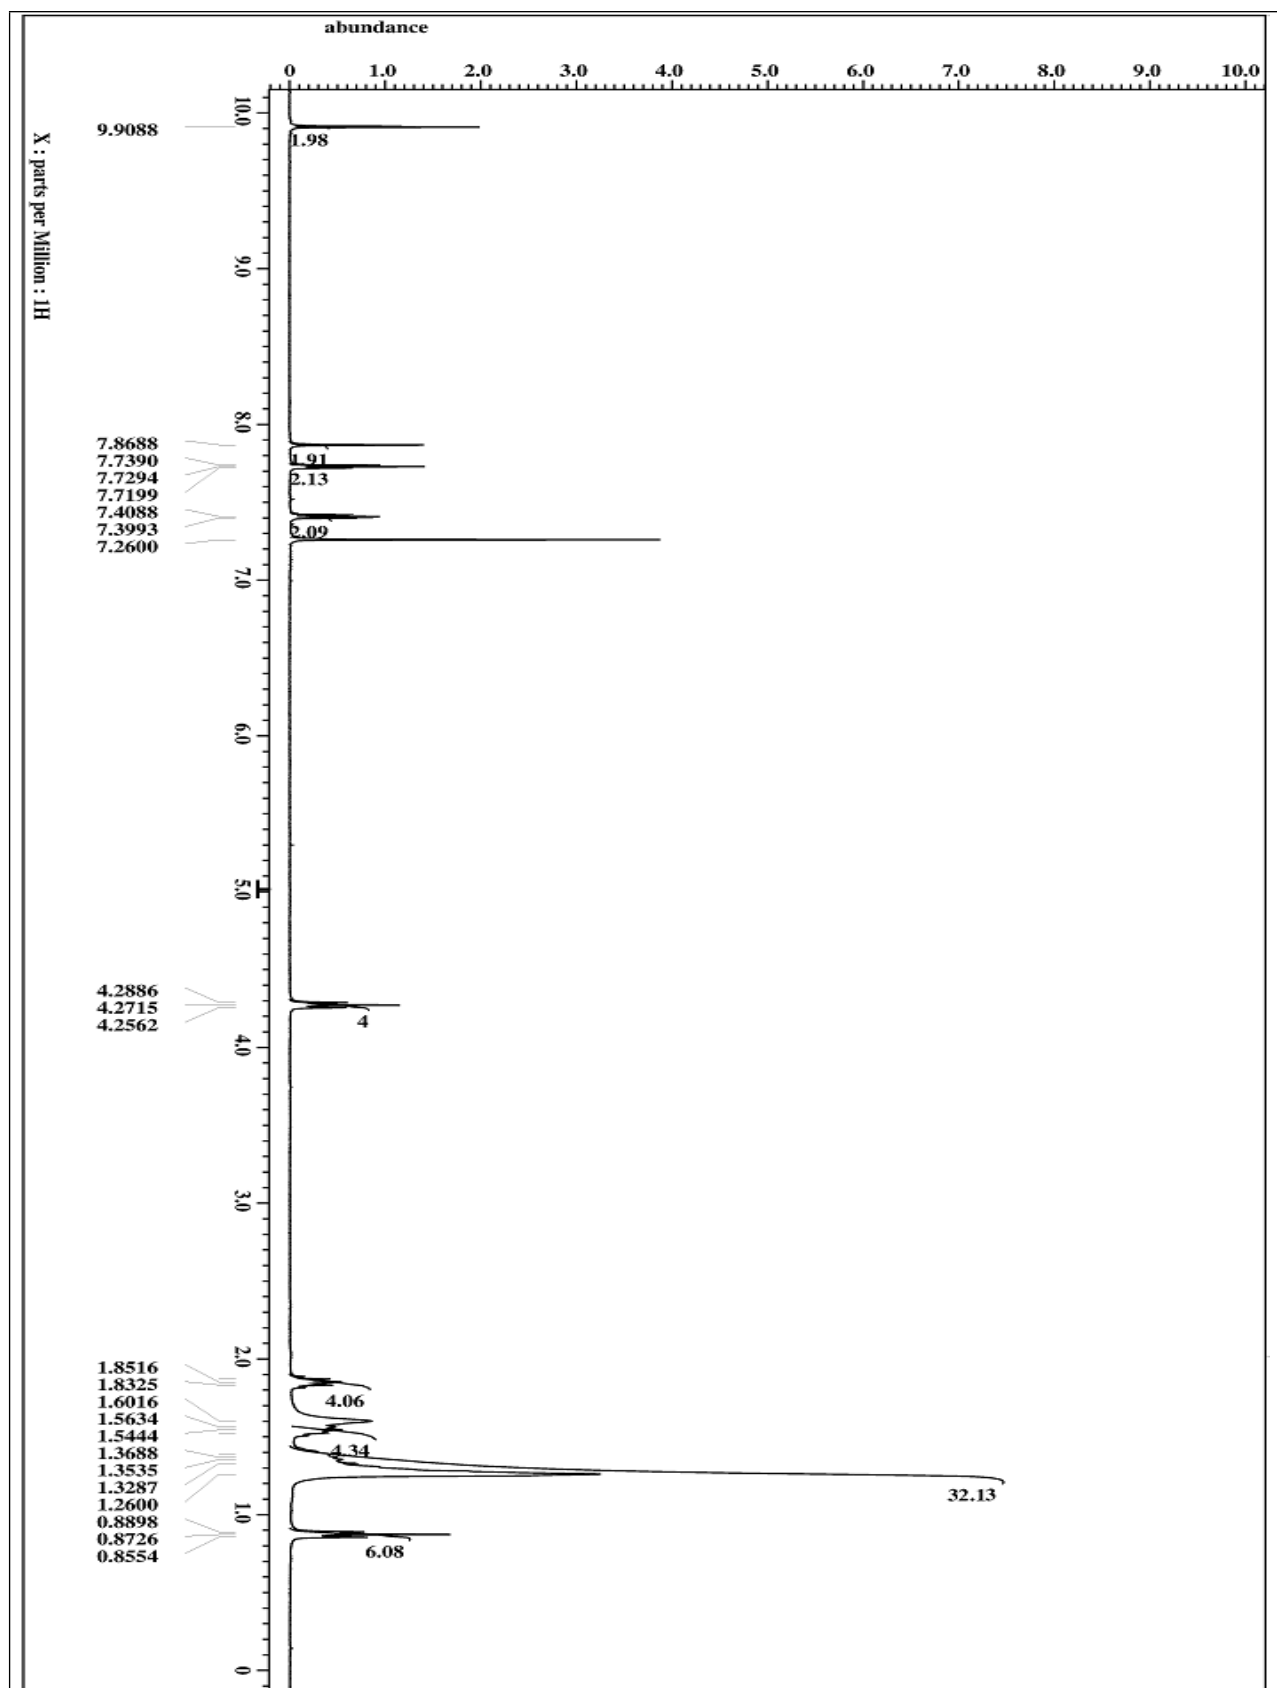

Fig. S3  $^1\text{H}$  NMR of compound 4

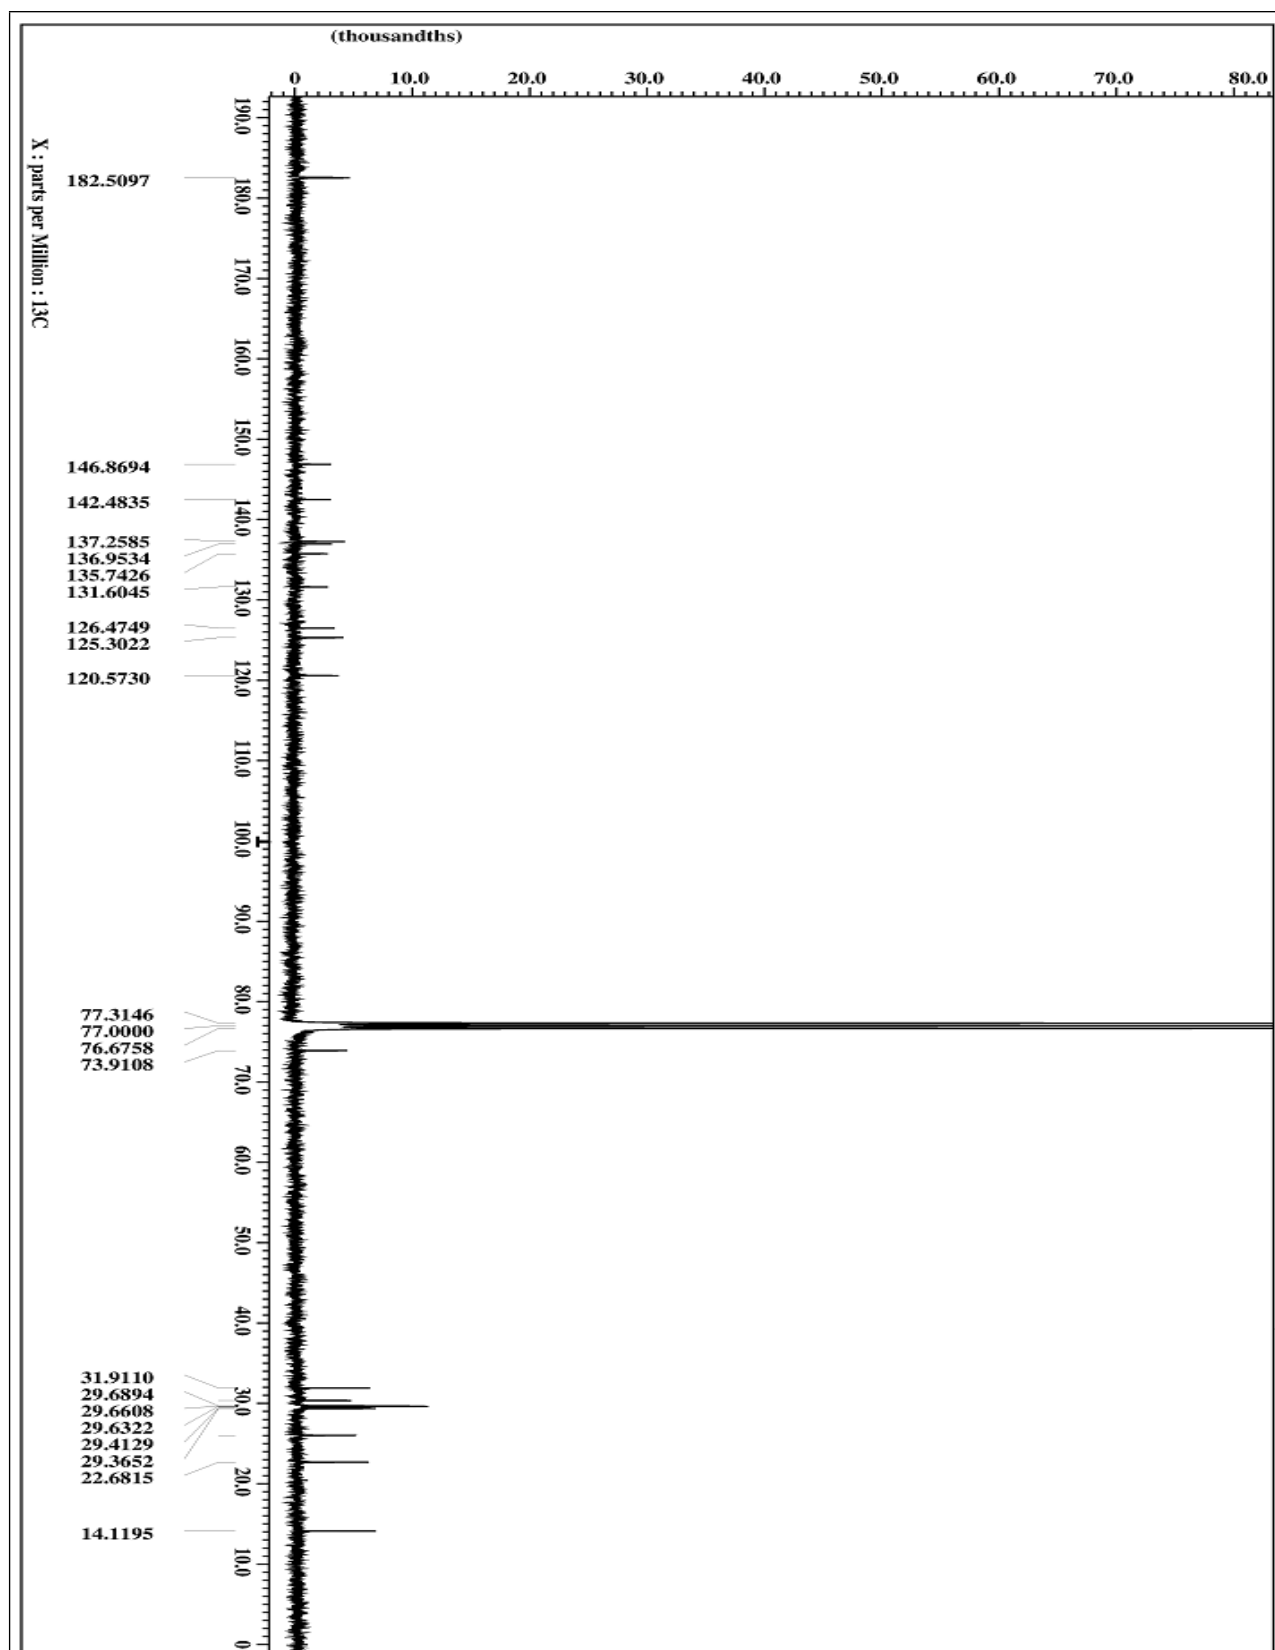

Fig. S4  $^{13}\text{C}$  NMR of compound 4

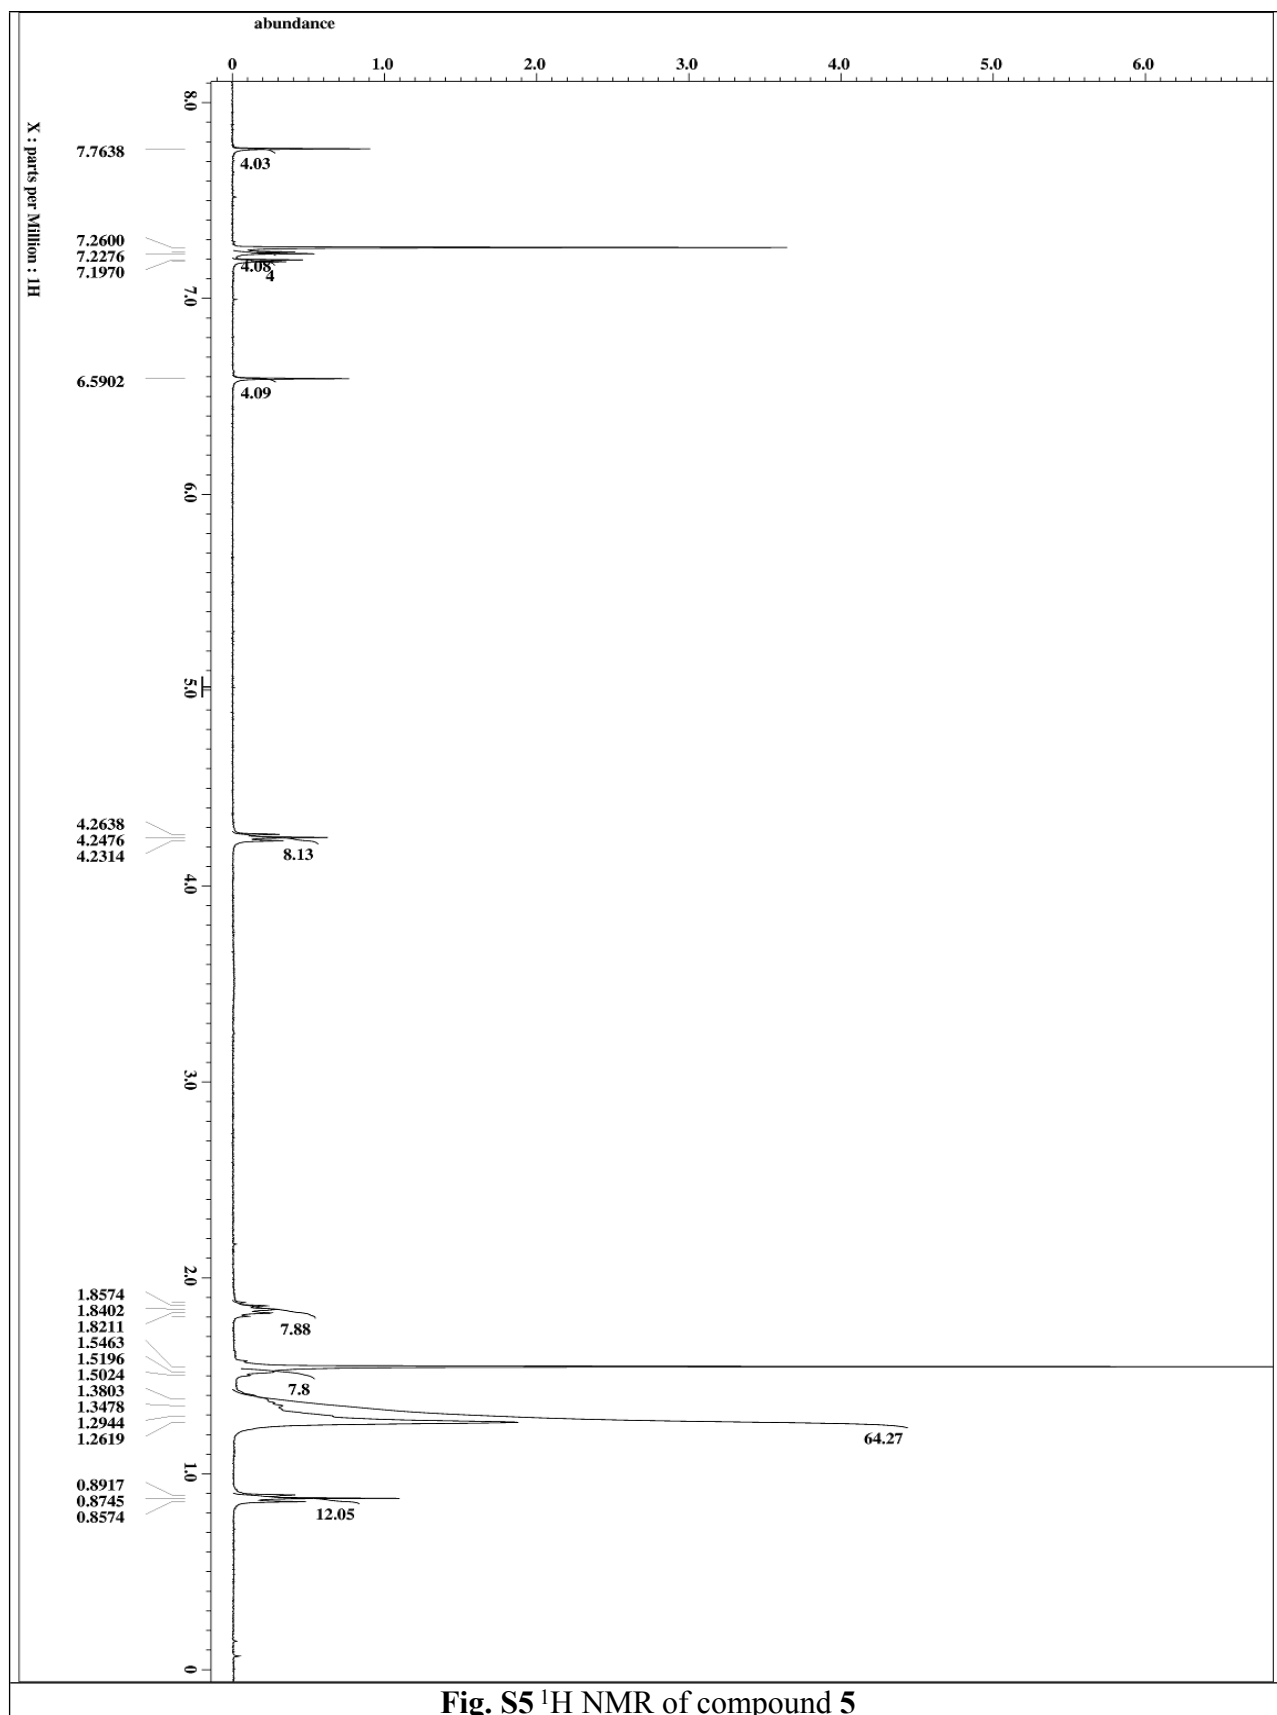

Fig. S5 <sup>1</sup>H NMR of compound 5

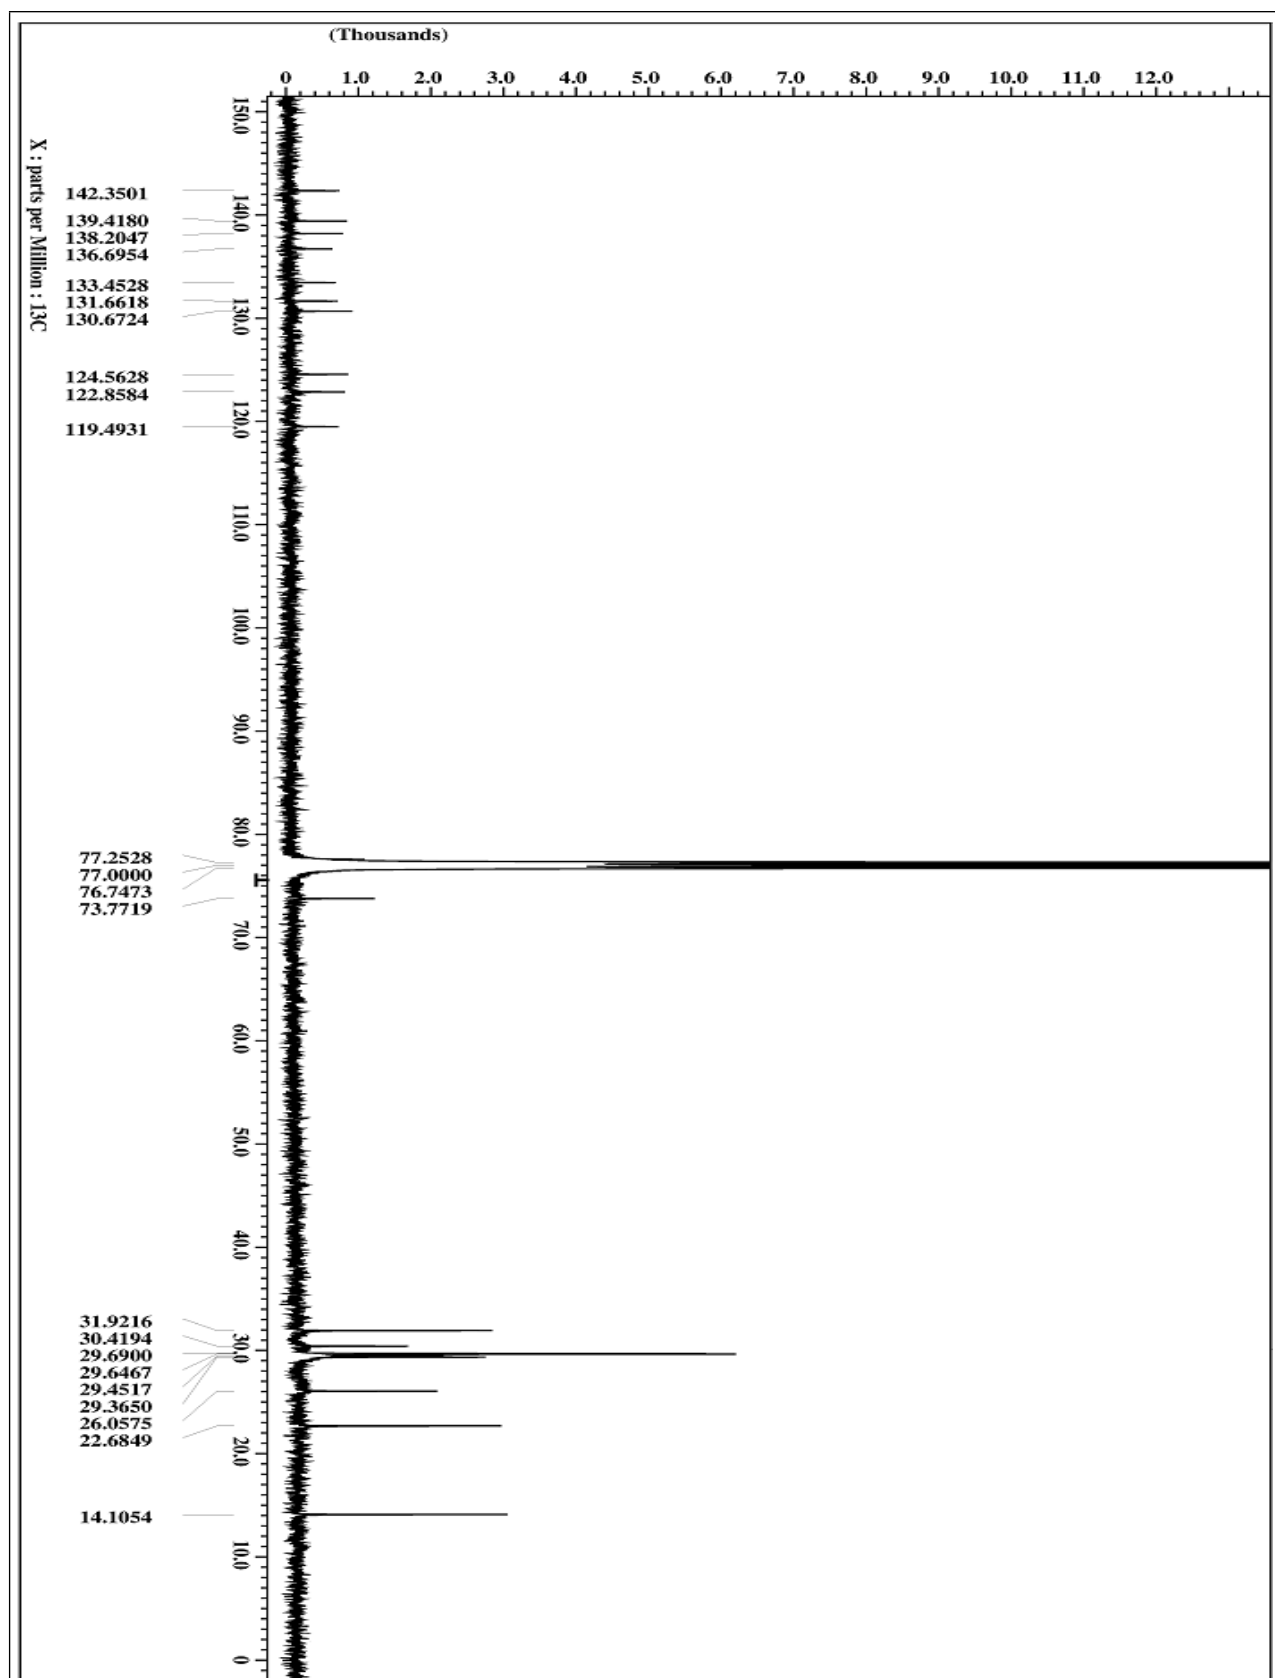

Fig. S6  $^{13}\text{C}$  NMR of compound 5

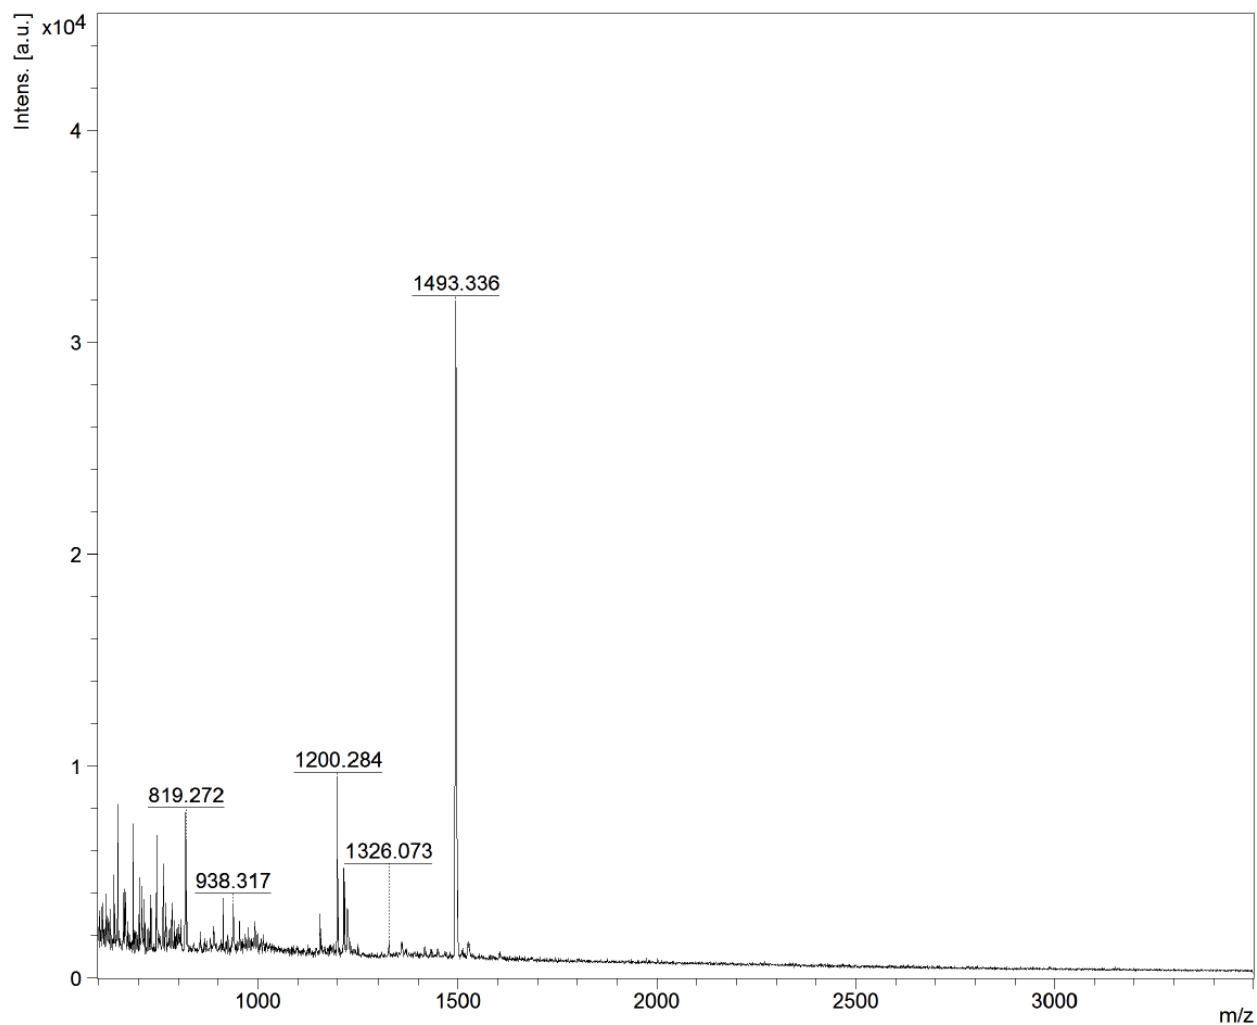

Fig. S7 MALDI-TOF Mass spectrometry of **5**

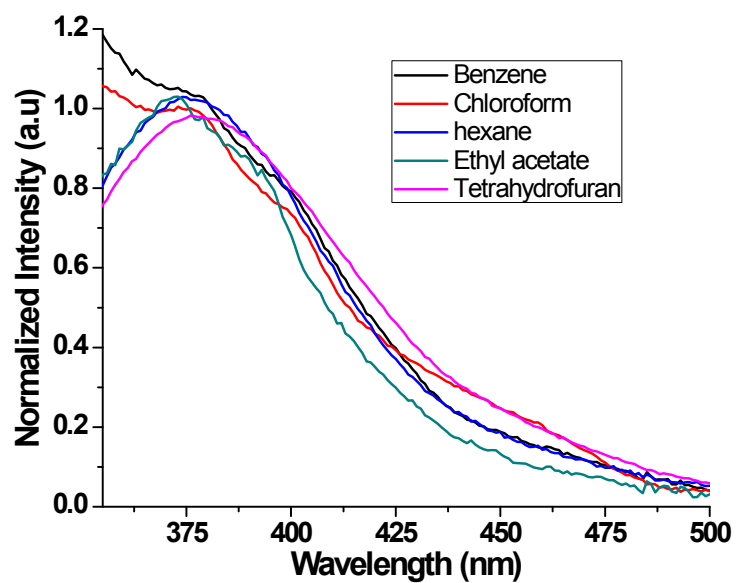

Fig. S8 UV-vis spectra of the macrocycle (**5**) in various solvents.



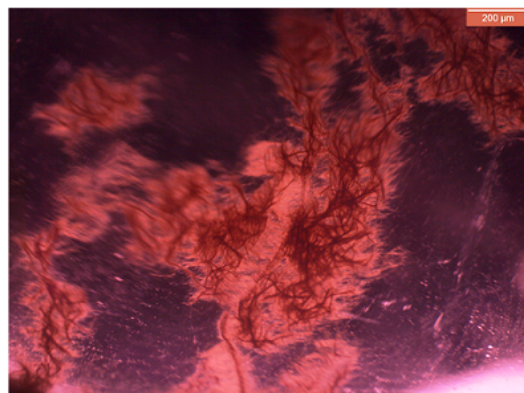

(a)

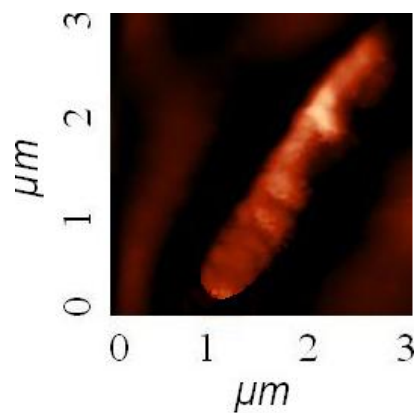

(b)

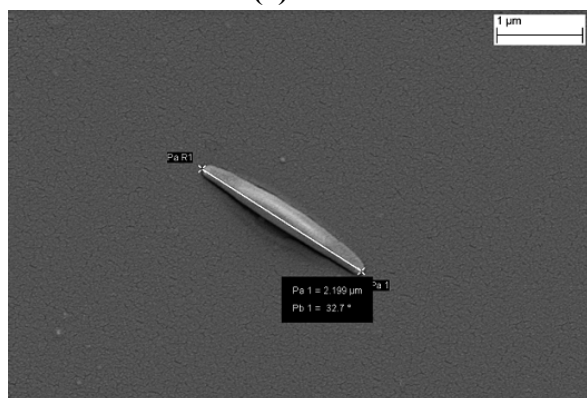

(c)

**Fig. S9** (a) Micrograph on a glass plate using a light microscope with 1000 $\times$  magnification. (b) AFM topography of a single fibre obtained on SiO<sub>2</sub> surface. (c) SEM images of single microfiber of the macrocycle on a silicon wafer with 44000  $\times$  magnification (right).

**Table S1** NICS (0 to 2 and 0 to -2) value calculated at B3LYP/6-311+G(d,p) on the optimized structure of macrocycle **5** at B3LYP/6-31G(d).<sup>a</sup>

| Position of Bq | 0   | 1   | 2   | -1  | -2  |
|----------------|-----|-----|-----|-----|-----|
| NICS value     | 1.7 | 1.6 | 1.2 | 1.3 | 0.7 |

<sup>a</sup> The coordinates of Bq(0) to get NICS(0) was calculated by averaging the coordinates of four hydrogen and four sulfur atoms of the inside periphery of the macrocycle **5**. Bq(1, 2, -1, -2) were placed with respect to Bq(0).

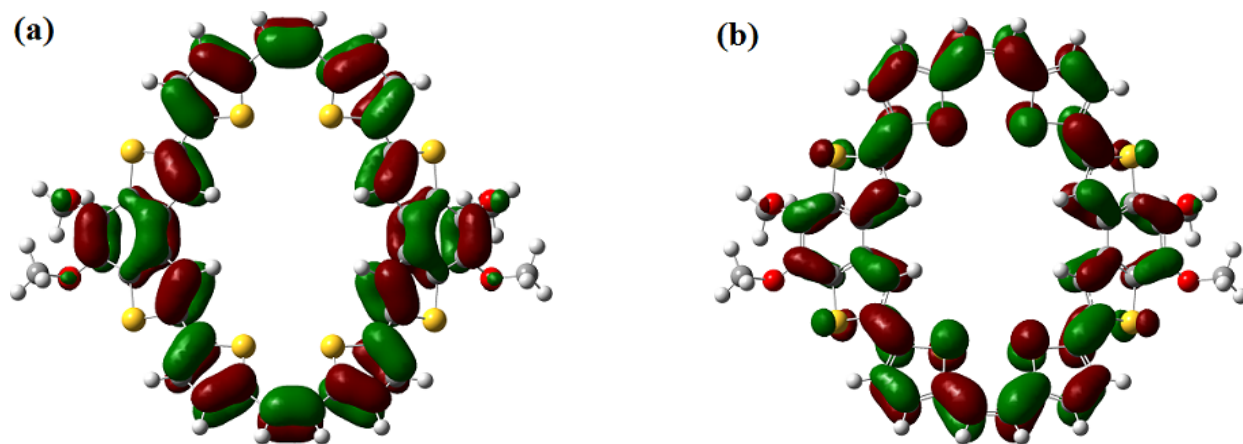

**Fig. S10** Optimized structure of the frontier orbitals; (a) HOMO and (b) LUMO of the macrocycle.

### Fluorescence decay:

The fluorescence decay for compound **5** was also studied to confirm the formation of the excimer. This needed a single exponential fit in solution but required a double exponential fit in solid state. In solution, a sole component of **5** with a lifetime ( $\tau_1$ ,  $x^2 = 1.26$ ) of 1.15 ns was present. But, in film two components were present with lifetime of 445 ps ( $\tau_1$ , 37%,  $x^2 = 1.17$ ) and 1.12 ns ( $\tau_2$ , 63%,  $x^2 = 1.17$ ). As the higher lifetime is believed to be found from the excimer species, the excimers dominated the fluorescent behavior of the compound in solid to shift the  $\lambda_{max}^{em}$  by 200 nm to the lower energy.

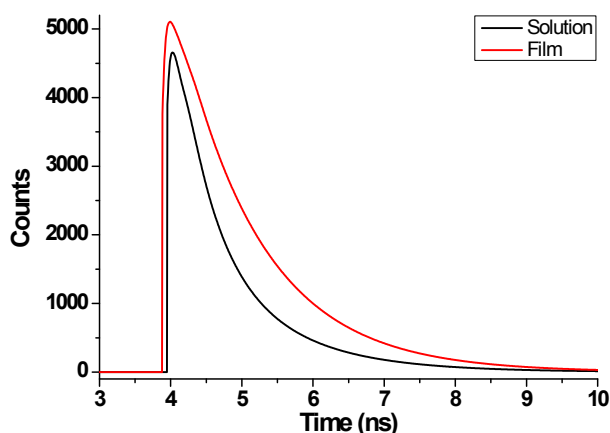

**Fig. S11** Decay of fluorescence for compound **5** in solution (49.06  $\mu\text{M}$ ) and thin film on ITO-coated glass.

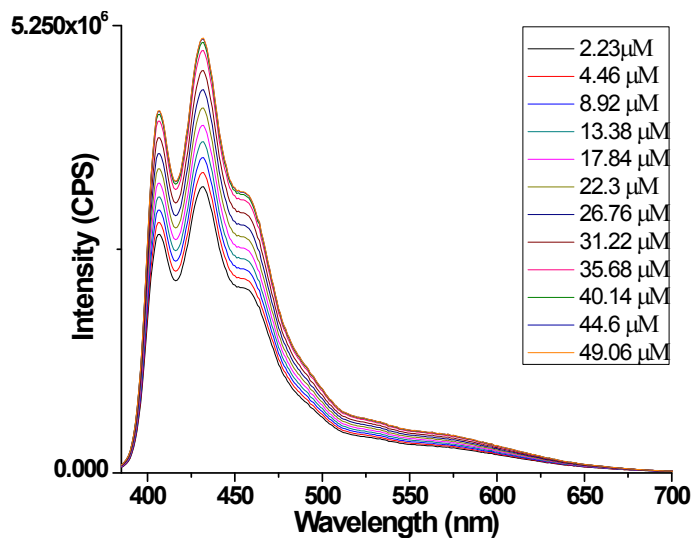

Fig. S12 Concentration dependent fluorescence spectra of **5** in THF.

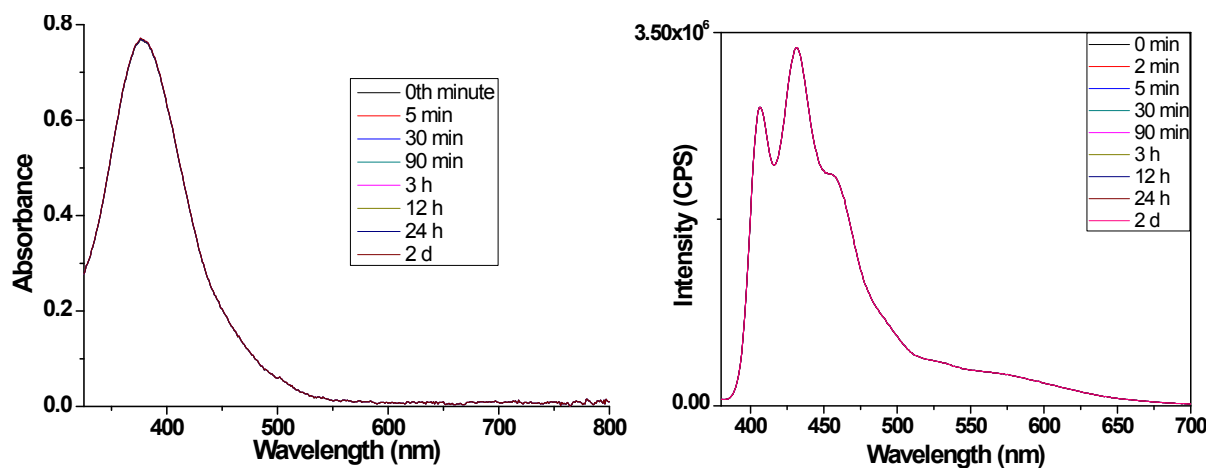

Fig. S13 Time-dependent absorption (left) and fluorescence (right) spectra of macrocycle **5** in THF.

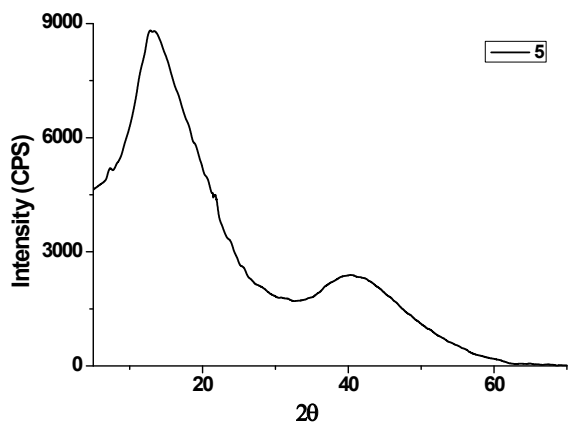

Fig. S14 Powder XRD pattern of compound **5**

### Coordinates for optimized geometry of 5 at B3LYP/6-31G(d)

| Center<br>Number | Atomic<br>Number | Atomic<br>Type | Coordinates (Angstroms) |           |           |
|------------------|------------------|----------------|-------------------------|-----------|-----------|
|                  |                  |                | X                       | Y         | Z         |
| 1                | 6                | 0              | -5.701480               | 1.364236  | 0.815192  |
| 2                | 6                | 0              | -4.595882               | 0.710376  | 0.227023  |
| 3                | 6                | 0              | -3.657474               | 1.643719  | -0.319830 |
| 4                | 6                | 0              | -4.032895               | 2.955895  | -0.169483 |
| 5                | 6                | 0              | -6.785758               | 0.685042  | 1.396778  |
| 6                | 6                | 0              | -4.599742               | -0.713365 | 0.206384  |
| 7                | 6                | 0              | -5.698393               | -1.378830 | 0.794448  |
| 8                | 6                | 0              | -6.773375               | -0.711058 | 1.406377  |
| 9                | 6                | 0              | -4.033287               | -2.951277 | -0.226025 |
| 10               | 6                | 0              | -3.662619               | -1.636085 | -0.360482 |
| 11               | 1                | 0              | -2.756061               | 1.350814  | -0.847503 |
| 12               | 1                | 0              | -2.765428               | -1.333248 | -0.889738 |
| 13               | 16               | 0              | -5.562420               | -3.115525 | 0.652647  |
| 14               | 16               | 0              | -5.565369               | 3.103454  | 0.706552  |
| 15               | 6                | 0              | -3.385557               | -4.150147 | -0.712340 |
| 16               | 6                | 0              | -3.984283               | -5.347956 | -1.054680 |
| 17               | 16               | 0              | -1.648835               | -4.249806 | -0.937808 |
| 18               | 6                | 0              | -3.072622               | -6.319645 | -1.508622 |
| 19               | 1                | 0              | -5.056704               | -5.501861 | -1.004085 |
| 20               | 6                | 0              | -1.746629               | -5.907842 | -1.515281 |
| 21               | 1                | 0              | -3.363920               | -7.313963 | -1.831018 |
| 22               | 6                | 0              | -3.385043               | 4.163181  | -0.633770 |
| 23               | 6                | 0              | -3.983942               | 5.366598  | -0.955858 |
| 24               | 16               | 0              | -1.648367               | 4.267178  | -0.857180 |
| 25               | 6                | 0              | -3.072583               | 6.346082  | -1.393080 |
| 26               | 1                | 0              | -5.056329               | 5.519613  | -0.902236 |
| 27               | 6                | 0              | -1.746489               | 5.934664  | -1.406597 |
| 28               | 1                | 0              | -3.363995               | 7.345749  | -1.698374 |
| 29               | 16               | 0              | 1.648363                | 4.267183  | -0.857172 |
| 30               | 6                | 0              | 3.072577                | 6.346092  | -1.393062 |
| 31               | 6                | 0              | 3.385040                | 4.163188  | -0.633761 |
| 32               | 6                | 0              | 3.983937                | 5.366609  | -0.955839 |
| 33               | 1                | 0              | 3.363987                | 7.345760  | -1.698351 |
| 34               | 6                | 0              | 4.032893                | 2.955901  | -0.169479 |
| 35               | 1                | 0              | 5.056323                | 5.519627  | -0.902213 |
| 36               | 6                | 0              | 3.657474                | 1.643725  | -0.319830 |
| 37               | 16               | 0              | 5.565367                | 3.103460  | 0.706557  |
| 38               | 6                | 0              | 4.595883                | 0.710383  | 0.227021  |
| 39               | 1                | 0              | 2.756061                | 1.350821  | -0.847503 |
| 40               | 6                | 0              | 5.701481                | 1.364242  | 0.815191  |
| 41               | 6                | 0              | 4.599745                | -0.713359 | 0.206376  |
| 42               | 6                | 0              | 6.785760                | 0.685048  | 1.396776  |
| 43               | 6                | 0              | 5.698398                | -1.378824 | 0.794436  |
| 44               | 6                | 0              | 3.662623                | -1.636078 | -0.360493 |
| 45               | 6                | 0              | 6.773378                | -0.711053 | 1.406367  |
| 46               | 16               | 0              | 5.562427                | -3.115519 | 0.652629  |
| 47               | 6                | 0              | 4.033292                | -2.951269 | -0.226040 |
| 48               | 1                | 0              | 2.765431                | -1.333239 | -0.889748 |
| 49               | 6                | 0              | 3.385564                | -4.150139 | -0.712358 |
| 50               | 6                | 0              | 3.984291                | -5.347945 | -1.054704 |
| 51               | 16               | 0              | 1.648841                | -4.249800 | -0.937823 |

|    |   |   |           |           |           |
|----|---|---|-----------|-----------|-----------|
| 52 | 6 | 0 | 3.072630  | -6.319636 | -1.508646 |
| 53 | 1 | 0 | 5.056712  | -5.501849 | -1.004112 |
| 54 | 6 | 0 | 1.746635  | -5.907839 | -1.515289 |
| 55 | 1 | 0 | 3.363929  | -7.313952 | -1.831046 |
| 56 | 8 | 0 | -7.798665 | -1.456626 | 1.938415  |
| 57 | 8 | 0 | -7.799671 | 1.419803  | 1.964983  |
| 58 | 8 | 0 | 7.799663  | 1.419811  | 1.964992  |
| 59 | 8 | 0 | 7.798671  | -1.456616 | 1.938411  |
| 60 | 6 | 0 | -9.059457 | 1.338994  | 1.278724  |
| 61 | 1 | 0 | -9.743797 | 1.985039  | 1.832462  |
| 62 | 1 | 0 | -8.960817 | 1.705549  | 0.250027  |
| 63 | 1 | 0 | -9.437637 | 0.312287  | 1.269734  |
| 64 | 6 | 0 | -7.916567 | -1.385238 | 3.368720  |
| 65 | 1 | 0 | -6.996765 | -1.740393 | 3.848279  |
| 66 | 1 | 0 | -8.131914 | -0.363283 | 3.695044  |
| 67 | 1 | 0 | -8.745160 | -2.045109 | 3.633869  |
| 68 | 6 | 0 | 9.059471  | 1.338984  | 1.278775  |
| 69 | 1 | 0 | 9.437643  | 0.312274  | 1.269810  |
| 70 | 1 | 0 | 8.960866  | 1.705528  | 0.250071  |
| 71 | 1 | 0 | 9.743796  | 1.985032  | 1.832528  |
| 72 | 6 | 0 | 7.916522  | -1.385261 | 3.368722  |
| 73 | 1 | 0 | 8.131847  | -0.363309 | 3.695077  |
| 74 | 1 | 0 | 6.996708  | -1.740436 | 3.848241  |
| 75 | 1 | 0 | 8.745114  | -2.045127 | 3.633886  |
| 76 | 6 | 0 | -0.681181 | 6.816336  | -1.814271 |
| 77 | 1 | 0 | -1.102358 | 7.747198  | -2.192450 |
| 78 | 6 | 0 | 0.681176  | 6.816338  | -1.814268 |
| 79 | 1 | 0 | 1.102351  | 7.747201  | -2.192446 |
| 80 | 6 | 0 | 1.746484  | 5.934668  | -1.406590 |
| 81 | 6 | 0 | -0.681162 | -6.782414 | -1.937783 |
| 82 | 1 | 0 | -1.102327 | -7.706736 | -2.331694 |
| 83 | 6 | 0 | 0.681169  | -6.782413 | -1.937786 |
| 84 | 1 | 0 | 1.102333  | -7.706735 | -2.331698 |

---

The optimized energy for the macrocycle (**5**) was obtained to be  $-5179.86$  a.u.

### Reference 23 in full

M. J. Frisch, G. W. Trucks, H. B. Schlegel, G. E. Scuseria, M. A. Robb, J. R. Cheeseman, G. Scalmani, V. Barone, B. Mennucci, G. A. Petersson, H. Nakatsuji, M. Caricato, X. Li, H. P. Hratchian, A. F. Izmaylov, J. Bloino, G. Zheng, J. L. Sonnenberg, M. Hada, M. Ehara, K. Toyota, R. Fukuda, J. Hasegawa, M. Ishida, T. Nakajima, Y. Honda, O. Kitao, H. Nakai, T. Vreven, J. A. Montgomery, Jr. J. E. Peralta, F. Ogliaro, M. Bearpark, J. J. Heyd, E. Brothers, K. N. Kudin, V. N. Staroverov, R. Kobayashi, J. Normand, K. Raghavachari, A. Rendell, J. C. Burant, S. S. Iyengar, J. Tomasi, M. Cossi, N. Rega, J. M. Millam, M. Klene, J. E. Knox, J. B. Cross, V. Bakken, C. Adamo, J. Jaramillo, R. Gomperts, R. E. Stratmann, O. Yazyev, A. J. Austin, R. Cammi, C. Pomelli, J. W. Ochterski, R. L. Martin, K. Morokuma, V. G. Zakrzewski, G. A. Voth, P. Salvador, J. J. Dannenberg, S. Dapprich, A. D. Daniels, O. Farkas, J. B. Foresman, J. V. Ortiz, J. Cioslowski and D. J. Fox, *Gaussian 09, Revision A.02*, Gaussian Inc., Wallingford CT, 2009.
